# Supplementary material for: One-pot synthesis of a carbon dots@zeolitic imidazolate framework-8 composite for enhanced Cu2+ sensing
Source: Royal Society of Chemistry journal article supplement (doi:10.1039/d0ay01121e), 2020-01-01
Supplement: d0ay01121e1.pdf [file d0ay01121e1.pdf]

Electronic Supplementary Information

## One-pot Synthesis of Carbon Nanodots@Zeolitic Imidazolate Framework-8 Composite for Enhanced Cu<sup>2+</sup> Sensing

Hao Guo\*, Xiaoqiong Wang, Ning Wu, Mengni Xu, Mingyue Wang, Longwen Zhang,  
Wu Yang\*

Key Lab of Eco-Environments Related Polymer Materials of MOE, Key Lab of Bioelectrochemistry and Environmental Analysis of Gansu Province, College of Chemistry and Chemical Engineering, Northwest Normal University, Gansu International Scientific and Technological Cooperation Base of Water-Retention Chemical Functional Materials, Lanzhou 730070, P R China.

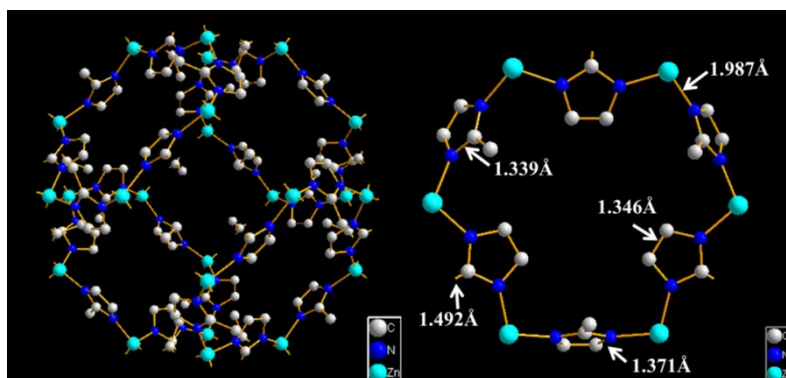

**Figure S1** Coordination mode for the H-MeIM ligand in ZIF-8.

---

\* Correspondence authors. Email: xbsfda123@126.com (W. Yang), haoguo12@126.com (H. Guo).

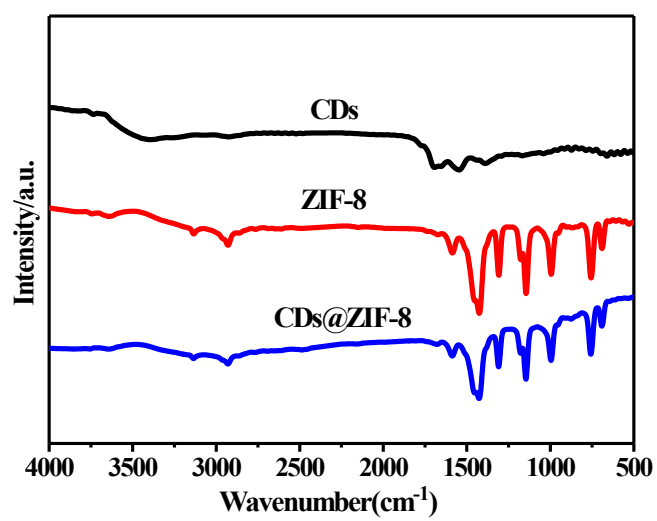

**Figure S2** FT-IR spectra of CDs, ZIF-8 and CDs@ZIF-8.

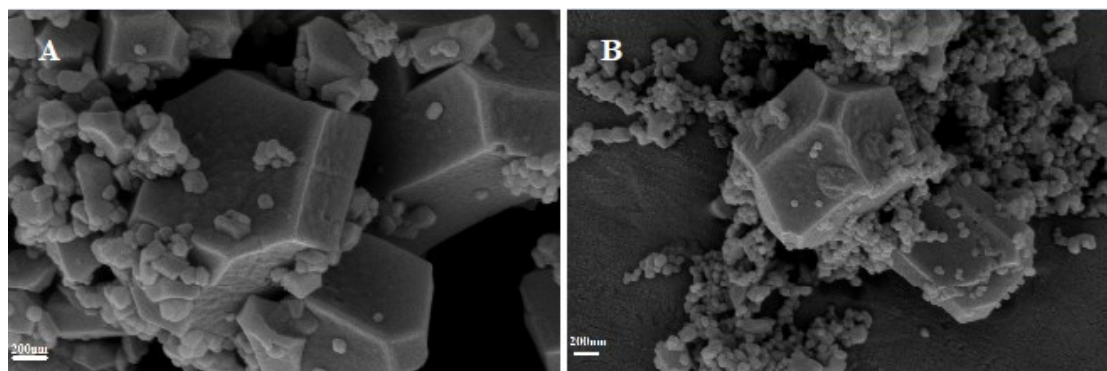

**Figure S3** SEM images of ZIF-8 and CDs@ZIF-8.

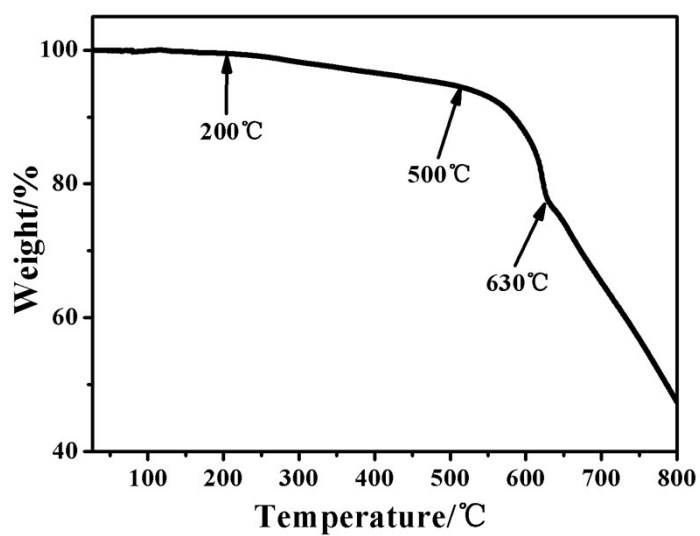

**Figure S4** TGA curve of CDs@ZIF-8

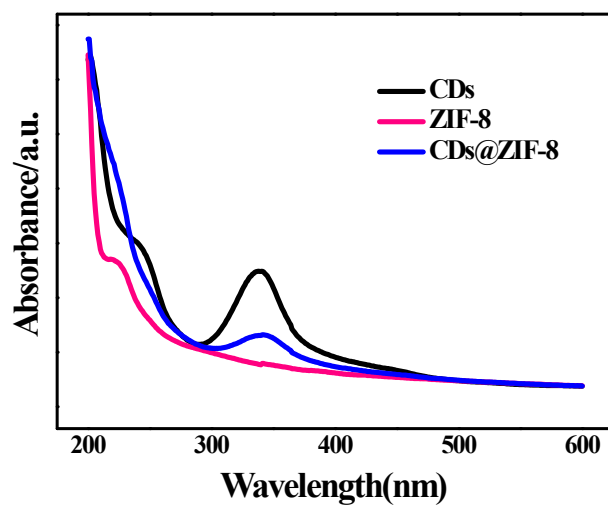

**Figure S5** UV-vis absorption spectra of the CDs(blank), ZIF-8(pink) and CDs@ZIF-8(blue).

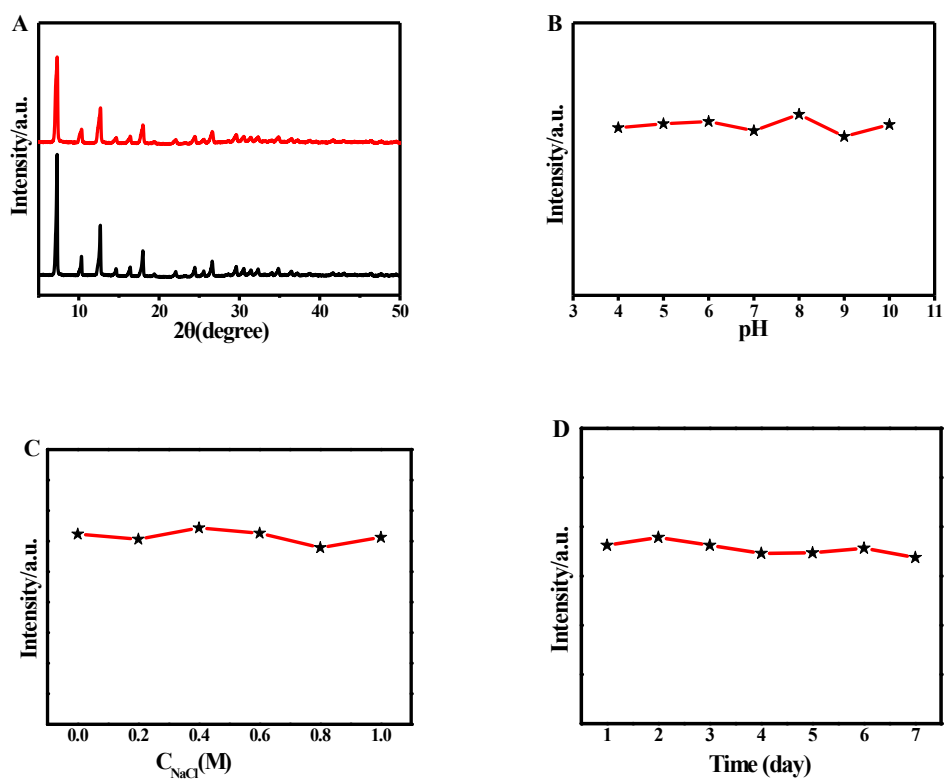

**Figure S6** (A) XRD patterns of CDs@ZIF-8 of as-synthesized (black line) and after treatment in H<sub>2</sub>O at 373 K (red line) for 24 h. The FL intensities of CDs@ZIF-8 at different pH (B), in different concentrations of NaCl (C) of different storage days (D)

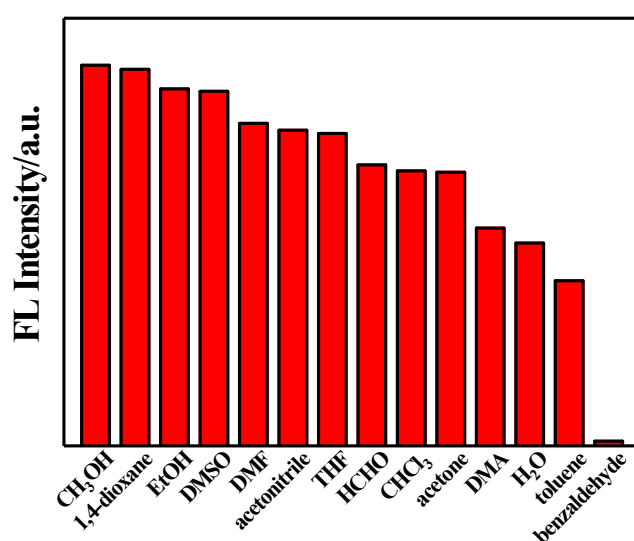

**Figure S7** Fluorescent intensities of CDs@ZIF-8 in different organic solvents.

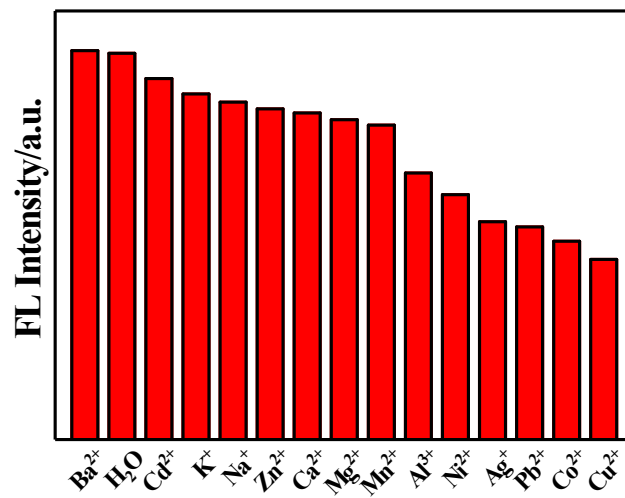

**Figure S8** Fluorescent intensities of CDs in the presence of different metal ions.

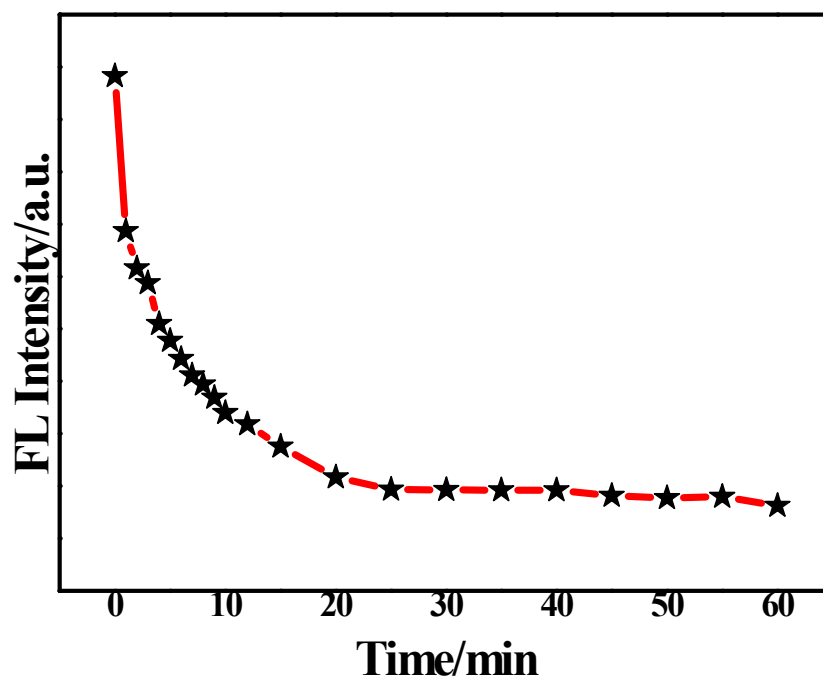

**Figure S9** The dependence of FL response of CDs@ZIF-8 on reaction time.

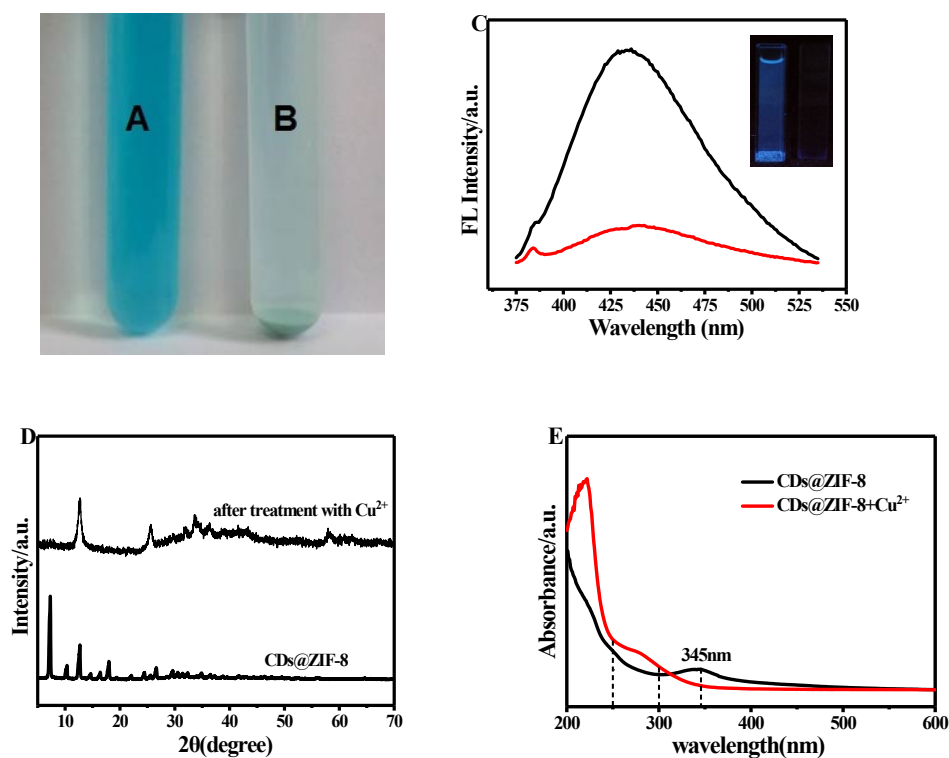

**Figure S10** Cu<sup>2+</sup> solution before (A) and after (B) adding CDs@ZIF-8. (C) Fluorescence spectra of the CDs@ZIF-8 before (black) and after (red) adding Cu<sup>2+</sup> solution, the inset shows the photographs of CDs@ZIF-8 dispersion in the absence (left) and presence (right) of Cu<sup>2+</sup> under UV light. (D) The XRD patterns of the CDs@ZIF-8 before and after treatment of Cu<sup>2+</sup>. (E) UV-vis absorption spectra of CDs@ZIF-8 and CDs@ZIF-8+Cu<sup>2+</sup>.

**Table S1** Cu<sup>2+</sup> amount of the solution by ICP before and after CDs@ZIF-8 treated with Cu<sup>2+</sup> for 2 h.

| Immersion time in Cu <sup>2+</sup> aqueous solution | Cu <sup>2+</sup> ion amount in filtrate after Cu <sup>2+</sup> exchanging |
|-----------------------------------------------------|---------------------------------------------------------------------------|
| 0 h                                                 | 1 μM                                                                      |
| 2 h                                                 | 1.52nM                                                                    |
